# Supplementary material
Source: MDPI journal article supplement (https://www.mdpi.com/2071-1050/15/4/3119)
Supplement: s1 [file s1]

# Supporting Information

## The Relationship between the Color Landscape Characteristics of Autumn Plant Communities and Public Aesthetics in Urban Parks in Changsha, China.

Table S1. KMO and Bartlett Test.

|                                   |                            |          |
|-----------------------------------|----------------------------|----------|
| KMO sampling suitability quantity | 0.673                      |          |
| Bartlett's test of sphericity     | The approximate chi-square | 1480.002 |
|                                   | Degree of freedom          | 105      |
|                                   | Saliency                   | 0.000    |

Table S2. Explanation of total variance.

| Component | Initial Eigenvalue |                   |                                    | Sum of Squared of Extracted Loads |                   |                                    | Sum of Squares of Rotational Loads |                   |                                    |
|-----------|--------------------|-------------------|------------------------------------|-----------------------------------|-------------------|------------------------------------|------------------------------------|-------------------|------------------------------------|
|           | Total              | Percent Variance% | Cumulative percentage of variance% | Total                             | Percent Variance% | Cumulative percentage of variance% | Total                              | Percent Variance% | Cumulative percentage of variance% |
| 1         | 5.413              | 36.087            | 36.087                             | 5.413                             | 36.087            | 36.087                             | 4.401                              | 29.342            | 29.342                             |
| 2         | 3.014              | 20.096            | 56.183                             | 3.014                             | 20.096            | 56.183                             | 3.551                              | 23.676            | 53.018                             |
| 3         | 2.232              | 14.878            | 71.062                             | 2.232                             | 14.878            | 71.062                             | 2.155                              | 14.368            | 67.386                             |
| 4         | 1.505              | 10.036            | 81.097                             | 1.505                             | 10.036            | 81.097                             | 2.057                              | 13.712            | 81.097                             |
| 5         | 0.768              | 5.120             | 86.217                             |                                   |                   |                                    |                                    |                   |                                    |
| 6         | 0.609              | 4.057             | 90.274                             |                                   |                   |                                    |                                    |                   |                                    |
| 7         | 0.420              | 2.801             | 93.074                             |                                   |                   |                                    |                                    |                   |                                    |
| 8         | 0.286              | 1.907             | 94.981                             |                                   |                   |                                    |                                    |                   |                                    |
| 9         | 0.227              | 1.515             | 96.496                             |                                   |                   |                                    |                                    |                   |                                    |
| 10        | 0.183              | 1.220             | 97.715                             |                                   |                   |                                    |                                    |                   |                                    |
| 11        | 0.141              | 0.942             | 98.657                             |                                   |                   |                                    |                                    |                   |                                    |
| 12        | 0.121              | 0.809             | 99.466                             |                                   |                   |                                    |                                    |                   |                                    |
| 13        | 0.058              | 0.387             | 99.853                             |                                   |                   |                                    |                                    |                   |                                    |
| 14        | 0.020              | 0.131             | 99.984                             |                                   |                   |                                    |                                    |                   |                                    |
| 15        | 0.002              | 0.016             | 100.000                            |                                   |                   |                                    |                                    |                   |                                    |

Table S3. Composition matrix after rotation.

| Serial Number | Color Element Indicator                 | Component |        |        |        |
|---------------|-----------------------------------------|-----------|--------|--------|--------|
|               |                                         | 1         | 2      | 3      | 4      |
| 1             | $R_P$ (Ratio of Primary Color)          | 0.961     | 0.128  | 0.000  | -0.156 |
| 2             | $N_P$ (Number of Primary Color)         | 0.903     | 0.101  | -0.009 | -0.207 |
| 3             | $R_{PH}$ (Ratio of Primary Hue)         | 0.833     | 0.009  | 0.055  | -0.135 |
| 4             | $R_A$ (Ratio of Adjunctive Color)       | -0.822    | 0.330  | -0.045 | -0.197 |
| 5             | $N_A$ (Number of Adjunctive Color)      | -0.789    | 0.351  | -0.121 | -0.189 |
| 6             | $E_C$ (Color Evenness Index)            | -0.339    | 0.858  | -0.05  | -0.024 |
| 7             | $I_B$ (Brightness Index)                | 0.078     | 0.845  | -0.014 | 0.063  |
| 8             | $H_C$ (Color Diversity Index)           | -0.433    | 0.816  | -0.204 | 0.145  |
| 9             | $I_S$ (Saturation Index)                | 0.251     | 0.683  | 0.216  | -0.15  |
| 10            | $N_C$ (Number of colors)                | -0.475    | 0.601  | -0.337 | 0.333  |
| 11            | $R_{WC}$ (Ratio of Warm and Cool Color) | 0.121     | -0.075 | 0.835  | -0.195 |
| 12            | $R_C$ (Color-leafed Index)              | 0.132     | 0.432  | 0.796  | -0.107 |
| 13            | $I_H$ (Hue Index)                       | -0.023    | 0.390  | -0.748 | -0.048 |
| 14            | $R_I$ (Ratio of Intersperse Color)      | -0.053    | 0.060  | -0.195 | 0.921  |
| 15            | $N_I$ (Number of Intersperse Color)     | -0.196    | 0.000  | -0.044 | 0.916  |

Note: Factor extraction method: PCA; rotation method: Kaiser's method of normalizing the fourth maximal power. The rotation converged after 5 iterations.

**Table S4.** One-way ANOVA of principal components.

| Principal Component | Scope         | Sum of Squares | Degree of Freedom | Mean Square | F     | Significance |
|---------------------|---------------|----------------|-------------------|-------------|-------|--------------|
| PC1                 | Between-Group | 8656.192       | 4                 | 2164.048    | 4.619 | 0.002        |
|                     | intragroup    | 37483.511      | 80                | 468.544     | --    | --           |
|                     | total         | 46139.704      | 84                | --          | --    | --           |
| PC2                 | Between-Group | 1940.278       | 4                 | 485.069     | 3.682 | 0.008        |
|                     | intragroup    | 10539.269      | 80                | 131.741     | --    | --           |
|                     | total         | 12479.546      | 84                | --          | --    | --           |
| PC3                 | Between-Group | 4924.343       | 4                 | 1231.086    | 2.712 | 0.036        |
|                     | intragroup    | 36315.033      | 80                | 453.938     | --    | --           |
|                     | total         | 41239.376      | 84                | --          | --    | --           |
| PC4                 | Between-Group | 1242.417       | 4                 | 310.604     | 4.904 | 0.001        |
|                     | intragroup    | 5066.444       | 80                | 63.331      | --    | --           |
|                     | total         | 6308.861       | 84                | --          | --    | --           |

Note: PC1 (primary and adjunctive color index), PC2 (color structure and property index), PC3 (autumn color-leafed index), and PC4 (intersperse color index).
